# Supplementary material
Source: publisher site journal article supplement (https://www.dovepress.com/article/supplementary_file/579990/579990%20Supplementary%20Table%201_1_1.xlsx)
Supplement: Supplementary file 1 [file 579990%20Supplementary%20Table%201_1_1.xlsx]

## Sheet: Sheet1
Author	Patient Gender	Patient Age (years)	Country	Voriconazole Treatment Duration (days)	Year	Title	Voriconazole Treatment Regimen	Blood Concentration (mg/L or μg/mL)	Efficacy and Safety	EORTC/MSGERC	Infection Site	Aspergillus Species	Outcome	Voriconazole - Related Adverse Reactions	Concomitant Antifungal Drugs
Bennis et al.34	Female	26	France	17	2015	High metabolic N - oxidation of voriconazole in a patient with refractory aspergillosis and CYP2C19*17/*17 genotype	Loading dose: 300 mg twice daily (approx. 6 mg/kg every 12 hours). Maintenance dose: 200 mg twice daily (approx. 4 mg/kg every 12 hours).	VRC serum concentrations at 2, 4, 8, and 12 hours after intravenous injection were 3.1, 0.95, 0.16, and 0.11 mg/L respectively. 1.1 mg/L on Day 15, dropped to 0.4 mg/L on Day 17.	Despite an initial serum concentration of 1.1 mg/L, the condition progressed. On Day 17, the patient had cough and hemoptysis, galactomannan and β - d - glucan in serum were positive, and CT showed new lung lesions, suggesting drug - resistant aspergillosis. Serum concentration was only 0.13 mg/L after dose increase.	Probable	Lung	NA	Controlled	NA	Combined with Liposomal Amphotericin B from Day 17; after voriconazole discontinuation, Liposomal Amphotericin B was combined with Caspofungin
Ferguson et al.35	Female	36	Ireland	110	2017	A suspected case of autoinduction of voriconazole metabolism in a patient with cerebral aspergillosis	Loading dose: 500 mg (6 mg/kg) every 12 hours for 2 doses. Maintenance dose: 320 mg (4 mg/kg) every 12 hours from Day 2.	Trough concentration 10.3 mg/L on Day 9, 0.88 mg/L on Day 26, stabilized between 3 - 5 mg/L after multiple dose adjustments from Day 40.	Condition effectively controlled after dose adjustment via TDM, brain abscess successfully drained, no further signs of infection	Probable	Brain	NA	NA	NA	Short - term use of fluconazole before voriconazole
Mochizuki et al.40	Male	73	Japan	?	2015	A case of treatment with voriconazole for chronic progressive pulmonary aspergillosis in a patient receiving tacrolimus for dermatomyositis - associated interstitial lung disease	Initial treatment: 600 mg/day (oral). Maintenance treatment: 400 mg/day (oral). Dose adjustment: 200 mg/day (oral) due to high voriconazole blood concentration causing abnormal liver function (AST 118 U/L, ALT 101 U/L). Blood concentration dropped to 2.31 mg/mL, liver function returned to normal (AST 17 U/L, ALT 16 U/L).	Voriconazole blood concentration increased from 2.21 mg/mL initially to 4.01 mg/mL, then dropped to 2.31 mg/mL after dose adjustment.	Symptoms improved (cough relieved), imaging showed improved infiltration in the left upper lung field, liver function recovered after dose adjustment	Probable	Lung	NA	Controlled	Dose - dependent hepatotoxicity	NA
Meyer et al.44	Male	53	Switzerland	65	2007	Breakthrough invasive pulmonary aspergillosis despite empirical voriconazole therapy for febrile neutropenia: Case report and review of the literature	Dose from Day 12 to Day 45: 200 mg orally twice daily (p.o. b.i.d.). From Day 65: 200 mg orally twice daily (p.o. b.i.d.). From Day 77: 4 mg/kg intravenously every 12 hours (i.v. q12 h).	Trough concentrations of voriconazole measured on Day 68 and Day 77 were 4.9 and 3.8 μg/mL respectively, and 3.7 μg/mL on Day 88.	Breakthrough infection occurred despite trough concentrations within the therapeutic range (4.9 μg/mL, 3.8 μg/mL, and 3.7 μg/mL). Combined therapy with amphotericin B was ineffective, and the cavity infiltration continued to expand. Voriconazole use was safe with no toxicity due to high blood concentration.	Proven	Left lower lung lobe	NA	No recurrence	NA	Fluconazole: 200 mg q.d. orally for prevention from Day 2 - 12 and during consolidation chemotherapy from Day 54. Amphotericin B: combined with voriconazole from Day 77 at 1.5 mg/kg i.v. q.d. until surgical resection on Day 104
Gu et al.48	Male	44	China	56	2023	Voriconazole - Induced Hepatotoxicity in a Patient with Pulmonary Aspergillosis: A Case Report	Intravenous phase: 200 mg twice daily for one week. After one week, switched to oral voriconazole at the same dose.	Trough concentration of 0.32 μg/mL when severe hepatotoxicity occurred.	No abnormal liver enzymes after one - week intravenous voriconazole at standard dose. Severe hepatotoxicity occurred after six weeks of oral voriconazole despite a trough concentration of 0.32 μg/mL (reference range 1 - 5.5 μg/mL). Drug discontinued.	Proven	Right upper lung lobe	NA	Controlled	Hepatotoxicity	Micafungin: 150 mg intravenously once daily for 3 days after voriconazole discontinuation. Posaconazole: initially 100 mg once daily, adjusted to 100 mg twice daily with a therapeutic blood concentration of 1.17 μg/mL for long - term oral maintenance
Ohashi et al.49	Male	58	Japan	129	2011	Breakthrough lung Scedosporium prolificans infection with multiple cavity lesions in a patient receiving voriconazole for probable invasive aspergillosis associated with monoclonal gammopathy of undetermined significance (MGUS)	Loading dose: 300 mg. Maintenance dose: 200 mg daily intravenously (IV), later increased to 400 mg daily.	2.87 μg/mL	Started voriconazole on Jan 3, 2009. CT on Feb 20, 2009 showed multiple cavity lesions in both lungs, indicating poor treatment effect. Dose increased to 400 mg daily but still ineffective. Died of respiratory failure on May 12, 2009.	Probable	Lungs	NA	Deceased	NA	Itraconazole (200mg/d IV, ~Dec 26, 2008) stopped days later due to acute respiratory failure. Liposomal Amphotericin B (3mg/kg/d, Jan 3, 2009) was discontinued after 1–2 weeks for pancytopenia, followed immediately by 1–2 weeks of Micafungin (50mg/d IV). Voriconazole was initiated upon Micafungin failure.
Schwartz et al.50	Male	18	Germany	175	1997	Successful treatment of cerebral aspergillosis with a novel triazole (voriconazole) in a patient with acute leukaemia	Initial (intravenous): 900 mg i.v. single dose on Day 138. Subsequent: 450 mg daily from Day 139 - 144. Later (oral): 200 mg twice daily from Day 144 to Day 311.	Plasma concentration range: 3.31 - 3.9 mg/L. CSF concentration range: 1.36 - 2.65 mg/L.	MRI showed brain abscess improvement, lung lesions disappeared. Transient visual disturbances and reversible elevation of alkaline phosphatase occurred but did not interrupt treatment.	Proven	Cerebral aspergillosis abscess	NA	Died of leukemia	Transient visual disturbances, reversible elevation of alkaline phosphatase	Amphotericin B desoxycholate: 1.1 mg/kg/d i.v. from Day 81, stopped on Day 86 due to nephrotoxicity. Liposomal amphotericin B: 2.1 mg/kg/d i.v. from Day 86 to Day 101. Itraconazole: 200 mg orally three times daily from Day 101 to Day 138
Gendrot et al.52	Male	71	France	358	2010	Neuropathie périphérique sous voriconazole au cours d’une aspergillosis pulmonaire cavitaire chronique	Initial: 200 mg twice daily (BID). Adjusted: 200 mg once daily (QD) due to high blood concentration and neuropathy. On Sep 11, 2007, blood concentration < 0.2 mg/L, readjusted to 400 mg once daily (QD). On Nov 20, 2007, switched to posaconazole 400 mg twice daily (BID).	1.2 mg/L on Aug 1, 2007; < 0.2 mg/L on Sep 11, 2007	Afebrile with decreased inflammatory markers/Aspergillus titers, 4kg weight gain, and partial pulmonary symptom/lesion resolution. Concentration-dependent neuropathy developed after one month of treatment.	Probable	Chronic cavitary pulmonary aspergillosis	NA	Partially relieved	Peripheral neuropathy	Switched to posaconazole after voriconazole discontinuation
Hu et al.54	Female	30	China	~210	2022	Case Report: First Report of T - Cell Large Granular Lymphocytic Leukemia With NPL - DHX9 Gene Fusion Successfully Treated With Cladribine: Clinical Experience and Literature Review	Started with 0.2 g every 12 hours (q12h). In Mar 2021 (relapse), adjusted to 0.15 g once daily (qd). In Apr 2021 (during T - LGLL treatment), readjusted to 0.15 g every 12 hours (q12h).	5.393 μg/mL (before reduction) and 0.283 μg/mL (after reduction)	High value of 5.393 μg/mL occurred when infection was initially controlled but near or above the upper limit, so dose was reduced. Then it dropped to 0.283 μg/mL while lung lesions continued to absorb and no fever	Probable	Basal segment of right lower lung	NA	Complete remission	NA	Aerosolized amphotericin B
Person et al.55	Female	72	USA	28	2010	Aspergillus niger: an unusual cause of invasive pulmonary aspergillosis	200 mg orally twice daily	1.0 mg/mL	Symptoms initially improved, white blood cell count normalized, but CT after 4 weeks showed significant progression with almost complete necrosis of the right upper lung lobe	Proven	Right upper lung lobe	Aspergillus niger	Recovery	NA	NA
Martínez - Casanova et al.36	Male	64	Spain	7	2018	Posaconazole achieves prompt recovery of voriconazole - induced liver injury in a case of invasive aspergillosis	Loading dose: 6 mg/kg twice daily, maintenance dose: 4 mg/kg twice daily.	4.12 mg/L	On Day 7, abnormal liver function with voriconazole blood concentration of 4.12 mg/L. ALP increased from 122 UI/L to 307 UI/L, GGT from 72 UI/L to 631 UI/L, ALT from 26 UI/L to 65 UI/L, AST from 18 UI/L to 63 UI/L.	Proven	Spine, brain	Aspergillus terreus	Complete recovery, good follow - up	Voriconazole - related hepatotoxicity	Posaconazole oral suspension 200 mg every 6 hours after voriconazole discontinuation. Caspofungin: 70 mg loading dose then 50 mg daily i.v.
Boyd et al.37	Male	22	USA	≥1730	2012	Utilization of Omeprazole To Augment Subtherapeutic Voriconazole Concentrations for Treatment of Aspergillus Infections	400 mg orally every 12 hours	Initial trough concentration 0.3 μg/mL, still 0.3 μg/mL after dose increase, increased to 0.9 μg/mL. After adding omeprazole (40 mg orally once daily), trough concentration was 1.5 μg/mL after 6 weeks. Subsequent monitoring showed voriconazole concentration between 1.5 - 1.8 μg/mL.	Initial sub-therapeutic levels led to persistent symptoms and new MRI-detected abscesses. Reaching target range (1–5.5 μg/mL) subsequently yielded clinical improvement, near-complete lesion absorption, and no new infections. Treatment saw 100% compliance with no significant toxicity reported.	Proven	Right frontal brain tissue	Aspergillus fumigatus	Recovery with no adverse reactions	NA	Voriconazole throughout (since 2008 at least until 2012 - 10). During this hospitalization (since Jun 2011): short - term combination with Liposomal Amphotericin B (about 1 - 2 months), brief use of Micafungin at discharge (about 4 weeks). Posaconazole only used in previous courses, not during this hospitalization.
Cojutti et al.38	Male	56	Italy	415	2019	Successful and safe long‐term treatment of cerebral aspergillosis with high‐dose voriconazole guided by therapeutic drug monitoring	Loading dose: 400 mg every 12 hours (q12h) for 2 days. Maintenance dose: 200 mg every 12 hours (q12h). First adjustment: increased to 200 mg every 8 hours (q8h). Second adjustment: further increased to 200 mg every 6 hours (q6h).	Initial Cmin <0.2 mg/L remained <1 mg/L (median 0.37) post-adjustment. Carbamazepine cessation raised Cmin to 1–5 mg/L, with a transient Day-79 increase to 2.34 mg/L via pantoprazole. Over 30 tests in 1 year, median (IQR) Cmin reached 1.59 (1.22–1.83) mg/L, yielding a median (IQR) Cmin/MIC of 3.18 (2.45–3.65), exceeding the >1 target.	At Day 415, NMR showed total brain lesion resolution with good clinical status. Post-treatment 1- and 6-month follow-ups confirmed sustained efficacy and no recurrence. Transient Day-79 ALT/AST elevations (111/86 IU/L) occurred due to pantoprazole-induced C min elevation.	Proven	Brain	Aspergillus fumigatus	Complete remission	Elevated liver enzymes	NA
Huang et al.39	Male	64	China	72	2024	Case report: dose - dependent interaction between dexamethasone and voriconazole in severely ill patients with non - Hodgkin’s lymphoma being treated for invasive pulmonary aspergillosis	Initial dose: 400 mg twice daily i.v. on Day 1; then maintenance dose: 200 mg every 12 hours i.v.	Day 21 (Jun 28, 2022): 0.2 mg/L; Day 27 (Jul 4, 2022): 0.1 mg/L; Day 31 (Jul 8, 2022): 1.7 mg/L; Day 35 (Jul 11, 2022): 2.6 mg/L; Day 39 (Jul 18, 2022): 2.0 mg/L; Day 46 (Aug 3, 2022): 1.0 mg/L; Day 50 (Aug 8, 2022): 1.8 mg/L; Day 59 (Aug 18, 2022): 1.9 mg/L.	When Cmin < 1 mg/L, poor treatment effect, infection progressed. When Cmin ≥ 1 mg/L, treatment improved, lung lesions improved, Aspergillus tests turned negative.	Probable	Lung	Aspergillus fumigatus	Significantly improved	NA	Liposomal Amphotericin B (L - AMB): 5 mg bid (reduced on Aug 15, 2022). Amphotericin B cholesterol sulfate complex (ABCD): 200 mg i.v. (course not detailed). Caspofungin: 50 mg qd (reduced on Jul 24), 70 mg single dose (Jun 29).
Danion et al.41	Female	75	France	~120	2018	Is It Time for Systematic Voriconazole Pharmacogenomic Investigation for Central Nervous System Aspergillosis?	Initial treatment: Liposomal Amphotericin B (L - AmB). Voriconazole added 1 week later, gradually increased to 350 mg b.i.d. (8 mg/kg b.i.d.).	Median concentration 1.7 mg/L, 60% < 2 mg/L.	Initially, two brain abscesses stable, but infection spread. Mild clinical improvement, stable brain lesions on MRI. Switched to isavuconazole due to low voriconazole concentration, with improved right - sided hemiplegia.	Proven	Brain	Aspergillus fumigatus	Partial neurological function recovery	NA	Day 0: IV L-AmB. Day 7: Added oral VCZ (trough <1 mg/L). Day 28: L-AmB discontinued due to renal failure; VCZ monotherapy remained sub-optimal. ~Day 120: Switched VCZ to ISA (200 to 300 mg QD), yielding clinical improvement.
Danion et al.41	Female	39	France	~30	2018	Is It Time for Systematic Voriconazole Pharmacogenomic Investigation for Central Nervous System Aspergillosis?	Initial treatment: Liposomal Amphotericin B (L - AmB). Voriconazole added 1 week later. Initial dose: 650 mg/day p.o. (in 2 divided doses, 55 kg patient). Gradually increased to 400 mg t.i.d. (7 mg/kg t.i.d.) to reach target concentration (> 2 mg/L).	Median concentration 1 mg/L, 80% < 2 mg/L.	After increasing to 400 mg t.i.d., concentration > 2 mg/L. Combined with caspofungin, MRI showed resolution of perilesional edema and occipital ring enhancement, with clinical improvement.	Proven	Brain	Aspergillus fumigatus	Condition alleviated	NA	Day 0: IV L-AmB. Day 7: Added oral VCZ (650mg/d BID), trough 0.79mg/L. Day 21: L-AmB stopped; VCZ monotherapy. ~Day 90: VCZ increased to 400mg TID (~7mg/kg TID) + CAS; trough >2mg/L. ~Day 120: VCZ/CAS maintenance with MRI improvement.
Poupelin et al.42	Male	56	France	90	2006	Pericardial and pleural diffusion of voriconazole during disseminated invasive aspergillosis: report of a case with successful outcome	Started oral voriconazole on Day 2 in ICU at 6 mg/kg/day for 2 days, then adjusted to 4 mg/kg/day.	Day 9, T12: 4.1 mg/L; Day 15, T12: 3.1 mg/L.	Fever/dyspnea improved; drainage tubes removed. Aspergillus from fluid was voriconazole-sensitive. CT showed lung/mediastinal lesion improvement. Discharged 30 days post-ICU; 2 months of additional treatment yielded recovery at 14 months post-diagnosis without recurrence.	Proven	Lungs, pericardium and pleura	Aspergillus fumigatus	Recovery	NA	Combined with caspofungin 50 mg/day from Day 7 in ICU until discharge.
Nowak et al.43	Male	64	Germany	≥60	2018	Voriconazole as mono - therapy in orbitofrontal erosive aspergillosis without gross total resection: A case report and review of literature	Loading dose: 400 mg i.v. on Day 1. Maintenance dose: 200 mg i.v. daily from Day 2.	Around 4.7 mg/L.	After 2 months of voriconazole treatment, MRI showed significant reduction of orbital mass.	Proven	Left orbit and anterior cranial fossa	Aspergillus fumigatus	Died of tumor burden	NA	NA
Fulco et al.45	Male	61	USA	198	2019	Pharmacogenetic testing for the treatment of aspergillosis with voriconazole in two HIV - positive patients	Initial: 200 mg twice daily (Day 1 - 30). Day 40: 200 mg twice daily (Day 40 - 62). Day 62: 200 mg once daily (Day 62 - 86). Day 86: 200 mg twice daily (Day 86 - 99). Day 99: 200 mg once daily (Day 99 - 175).	Day 22: 1.20 μg/mL; Day 40: 0.6 μg/mL; Day 62: 1.9 μg/mL; Day 86: 0.6 μg/mL; Day 99: 2.3 μg/mL; Day 175: 1.2 μg/mL.	After 6 months of treatment, clinical symptoms improved, no residual lung symptoms, negative BAL, and CT showed almost complete clearance of infection.	Proven	Lung	Aspergillus fumigatus	Clinically cured	NA	NA
Mathieu et al.46	Male	52	Canada	22	2022	Voriconazole Sequestration During Extracorporeal Membrane Oxygenation for Invasive Lung Aspergillosis: A Case Report	6mg/kg IV BID, then 4mg/kg IV BID. Day 15: two 6mg/kg loading doses added for potential ECMO circuit adsorption. Day 22: trough dropped to 0.8μg/mL; dose increased to 4.5mg/kg BID. Day 30: added L-AmB (5mg/kg/d). Day 34: dose increased to 6.5mg/kg TID.	Initial trough on Day 18: 5.8 μg/mL (1 - 6 μg/mL). Dropped to 0.8 μg/mL on Day 22, below target range. Despite dose increase (4.5 mg/kg twice daily), still < 1 μg/mL. Reached target range on Day 34 after increasing to 6.5 mg/kg three times daily.	Despite reaching target concentration finally, treatment was ineffective due to persistent sub - therapeutic trough during ECMO. Failed to control Aspergillus infection, and finally died of multiple infections including Acinetobacter baumannii pneumonia and bacteremia.	Proven	Lung	Aspergillus fumigatus	Treatment failure	NA	Caspofungin (initial 70 mg→50 mg/d, later increased to 70 mg/d). Aerosolized Liposomal Amphotericin B (25 mg tid). Intravenous Liposomal Amphotericin B (5 mg/kg/d).
Réminiac et al.47	Male	42	France	240	2014	Very - High - Dose Caspofungin Combined with Voriconazole To Treat Central Nervous System Aspergillosis: Substantial Penetration of Caspofungin into Cerebrospinal Fluid	Started combined treatment 2 days after admission, including i.v. voriconazole (6 mg/kg twice daily as loading dose, then 4 mg/kg twice daily) and i.v. caspofungin (280 mg as loading dose, then 140 mg/day).	Day 5: trough 5.2 mg/L; Day 11: trough 2.3 mg/L; Day 17: serum concentration low (not explicitly stated).	WBC decreased from 790/μL on Day 1 to 70/μL on Day 18, indicating significant control of inflammation. PMN proportion decreased from 80% on Day 1 to 60% on Day 17 and 18, showing reduced inflammatory cell infiltration.	Proven	Brain, lungs	Aspergillus fumigatus	Cured	NA	Intravenous combination (voriconazole + caspofungin) for 2 months.
Elter et al.51	Female	29	Germany	297	2006	Voriconazole brain tissue levels in rhinocerebral aspergillosis in a successfully treated young woman	Initially i.v. voriconazole at 4 mg/kg twice daily (bid). Switched to oral voriconazole at 4 mg/kg twice daily (bid) after initial efficacy.	0.6 μg/mL.	After 14 days of oral voriconazole, MRI showed further improvement. After 3 months of combined treatment, MRI showed significant improvement.	Proven	Rhinocerebral area	Aspergillus fumigatus	Treatment successful	NA	Initial L-AmB (10mg/kg IV x14d → 3mg/kg) failed. Relapse: combination therapy of VCZ (4mg/kg IV BID), CAS (70mg IV), and antibacterials (fosfomycin/flucloxacillin). Maintenance: oral VCZ (4mg/kg BID) monotherapy.
Takatsuka et al.56	Female	71	Japan	128	2020	Successful treatment of Aspergillus empyema using combined intrathoracic and intravenous administration of voriconazole: A case report	IV: D14 150mg; D15 150mg then 100mg Q12H; D16+ 100mg BID. D27: Added intrathoracic VRCZ (200mg in 50-100mL saline) via chest tube (clamped 5-6h then drained) as pleural levels were <MIC (1mg/mL). D71: Switched IV to oral 150mg BID.	Day 18: plasma trough 1.84 mg/mL; Day 21: 1.10 mg/mL; Day 28: 1.53 mg/mL (6% increase from Day 27); Day 29: 1.36 mg/mL (11% decrease from Day 28); later, plasma concentration increased non - linearly to 5.63 mg/mL with elevated liver function indicators.	Clinical symptoms improved, microbiological indicators negative.	Probable	Right pleural cavity	Aspergillus fumigatus	Cured	Mild hepatotoxicity (ALT, AST, γ - GTP elevated from Day 49 - 54 related to plasma trough > 5 mg/mL, resolved after dose reduction). Transient visual symptoms (light sensitivity, blurred vision) with no sequelae.	NA
Matsuda et al.33	Male	62	Japan	390	2010	A case of Aspergillus empyema successfully treated with combination therapy of voriconazole and micafungin: excellent penetration of voriconazole and micafungin into pleural fluid	Initially, oral voriconazole at 300 mg bid on day 0. Reduced to 150 mg bid (days 1–24). Increased to 300 mg bid (days 25–94). Finally, adjusted to 250 mg bid (days 95–390).	Serum C0 (μg/mL): Day 5 (150mg BID) 2.9; Day 16 (200mg BID) 3.2; Days 24, 33, 47, 54, 68, 82, 96 (300mg BID) 6.1, 6.5, 6.5, 5.8, 6.1, 5.7, 9.1; Day 110 (250mg BID) 6.0. Pleural fluid C0 (μg/mL): Day 16 (200mg BID) 0.7; Days 24, 54, 68 (300mg BID) 1.4, 4.4, 4.3.	Treatment effective, abnormal liver function occurred.	Proven	Left pleural cavity	Aspergillus fumigatus	Cured	Abnormal liver function tests (elevated LFTs) and sudden increase in voriconazole trough concentration on Day 95.	Combined treatment (VRCZ + MCFG) from Day 25–115, 90 days in total.
